# Supplementary material
Source: publisher site journal article supplement (https://www.dovepress.com/article/431917)
Supplement: Supplementary file 1 [file get_supplementary_file.php]

**(A)**

**Before treatment**

**After treatment**

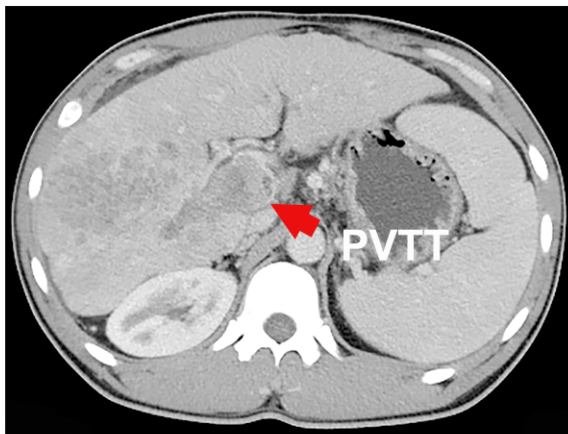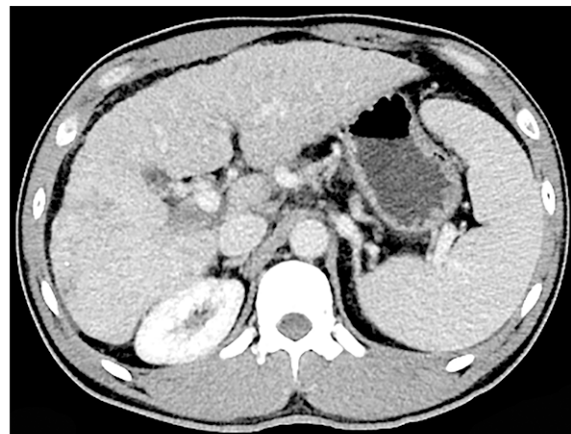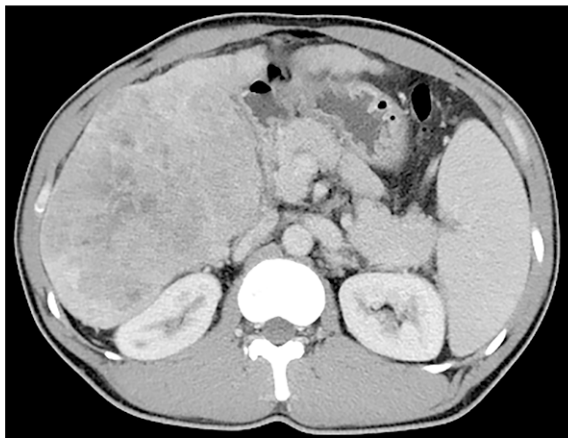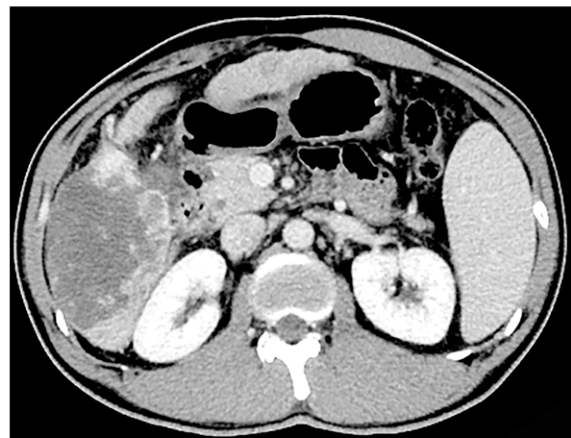

**(B)**

**Before treatment**

**After treatment**

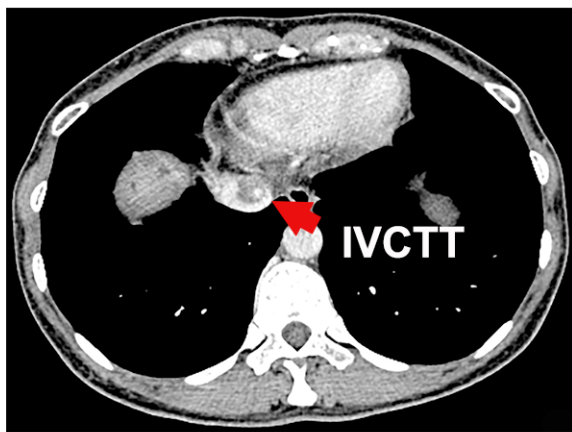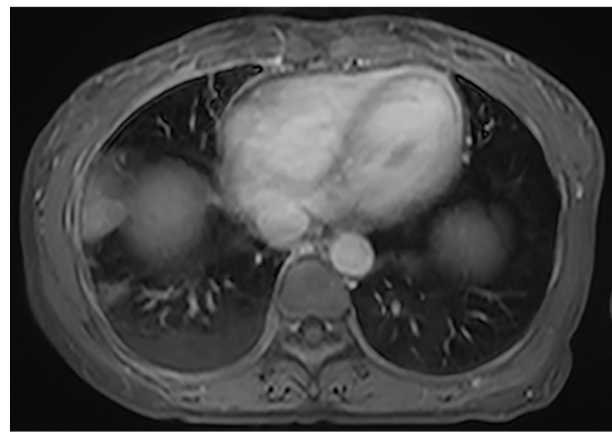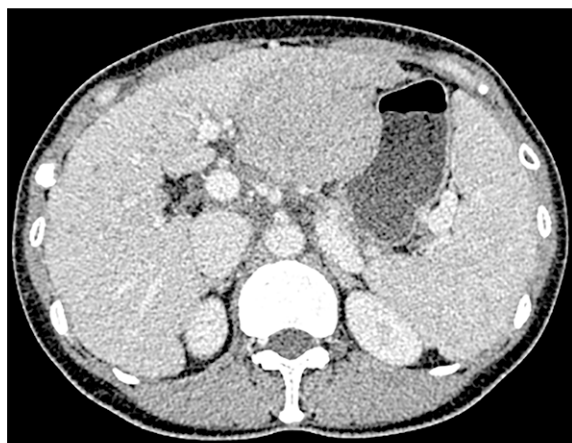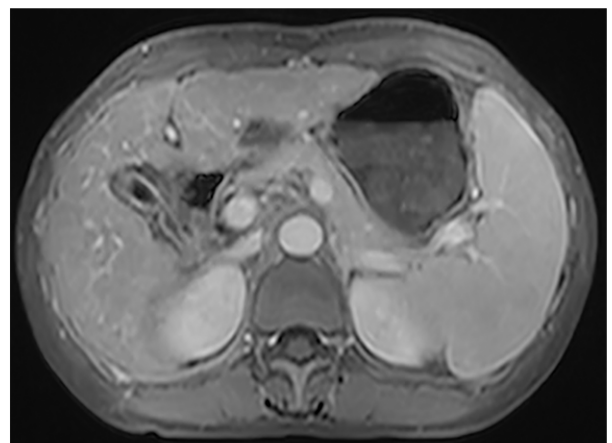

**(C)** Before treatment

After treatment

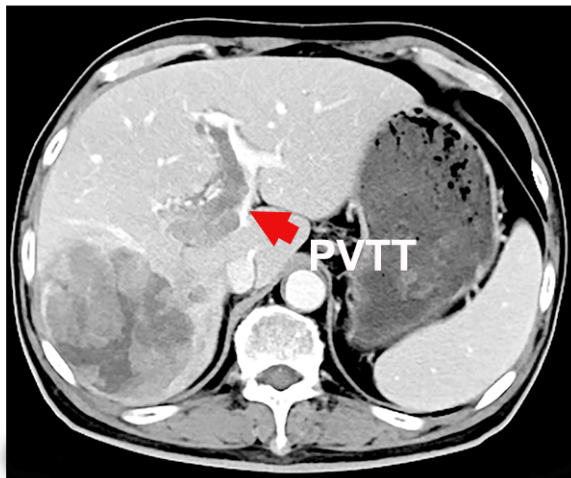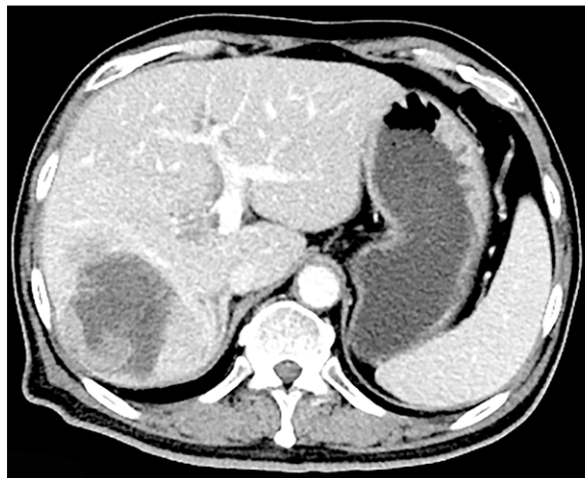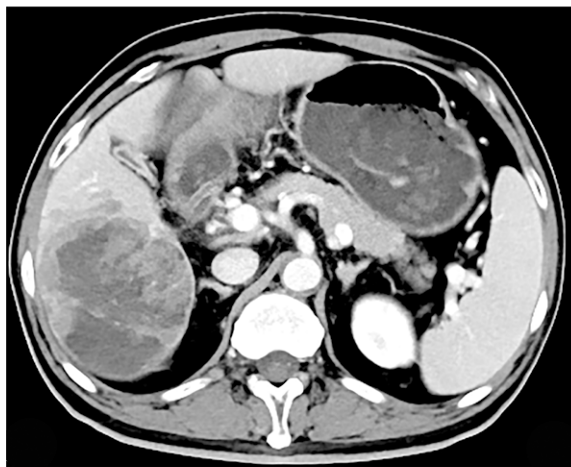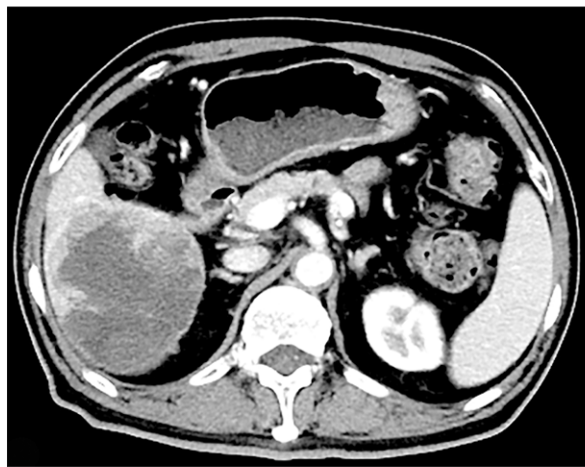

(D)

Before treatment

After treatment

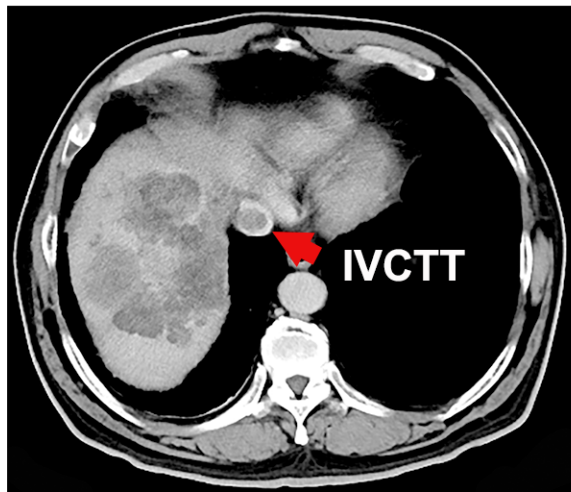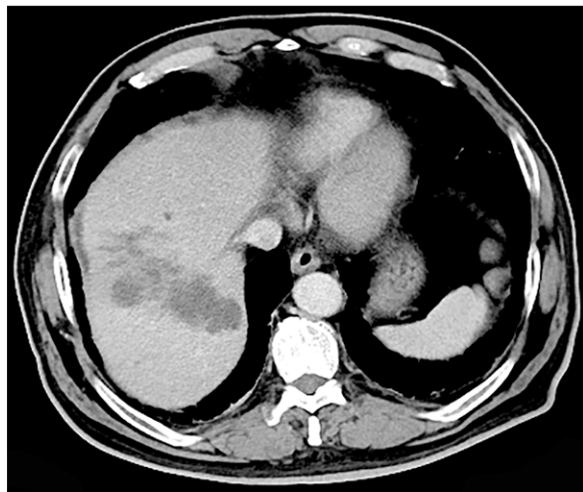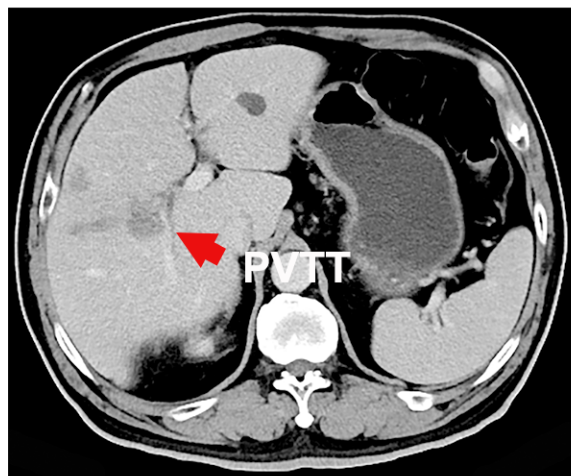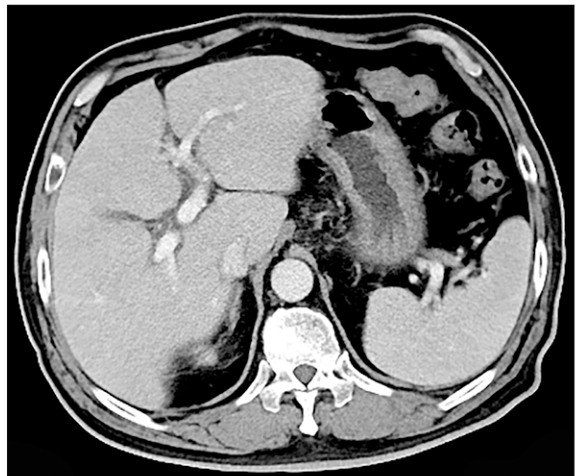

(E)

Before treatment

After treatment

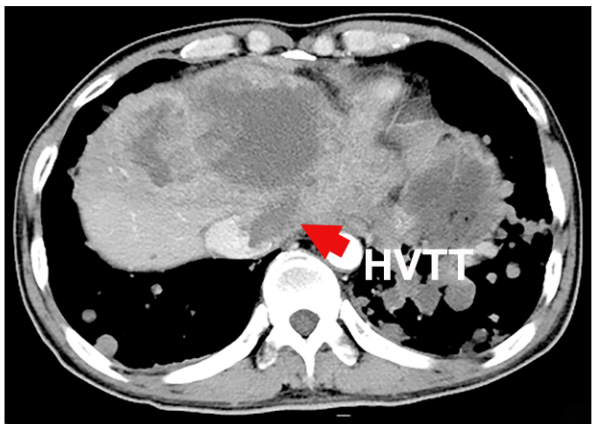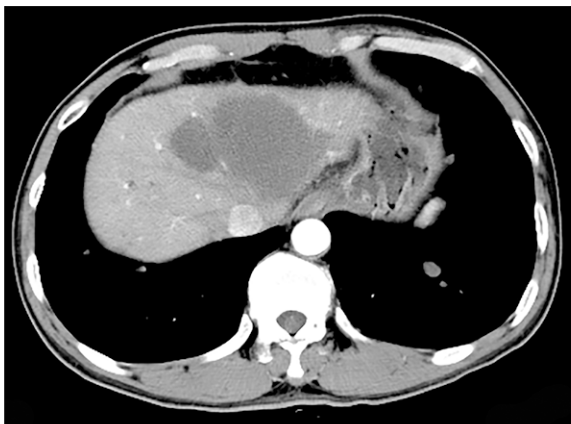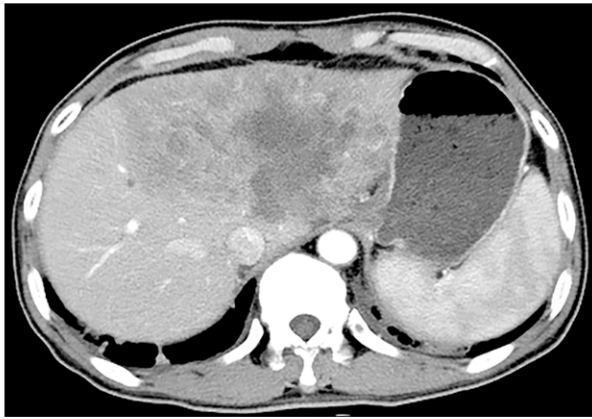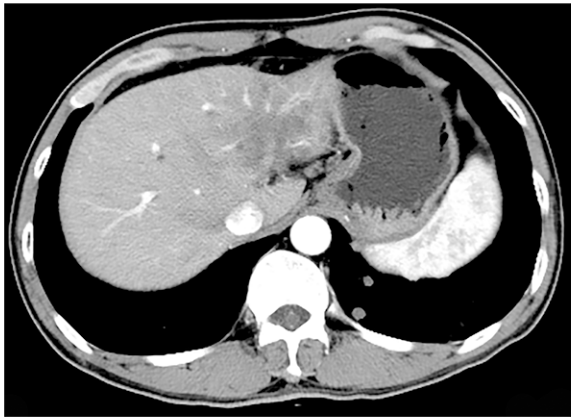

**(F)**

**Before treatment**

**After treatment**

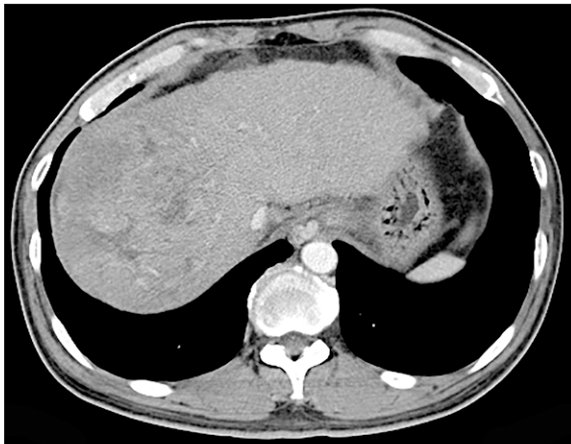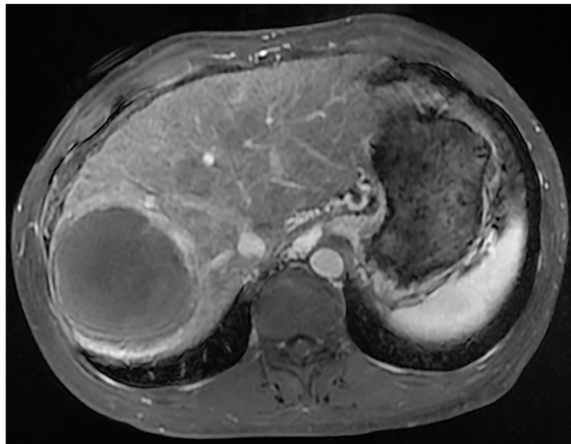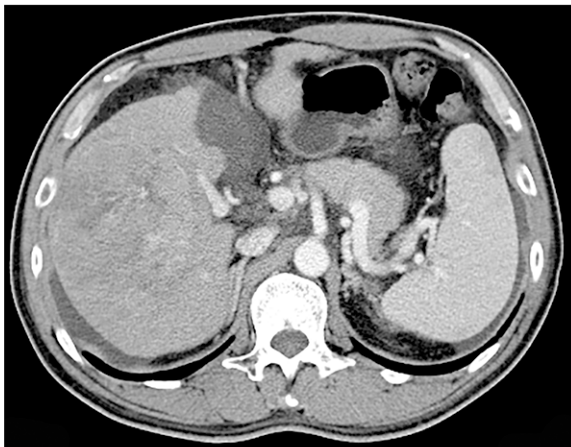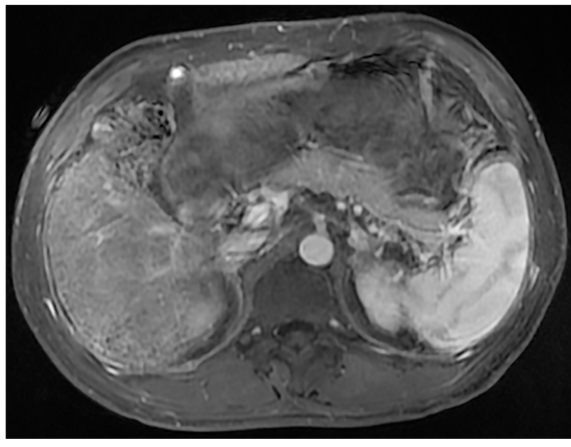

**(G)**

**Before treatment**

**After treatment**

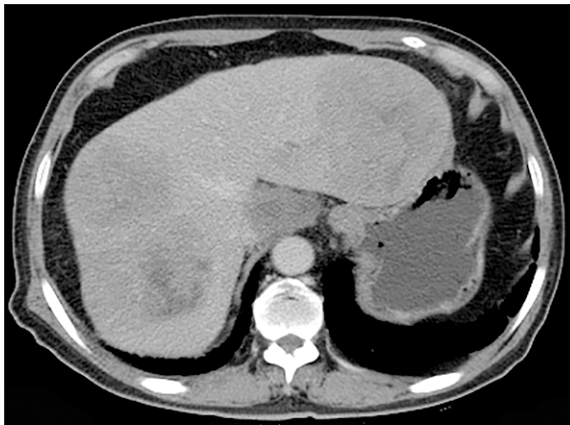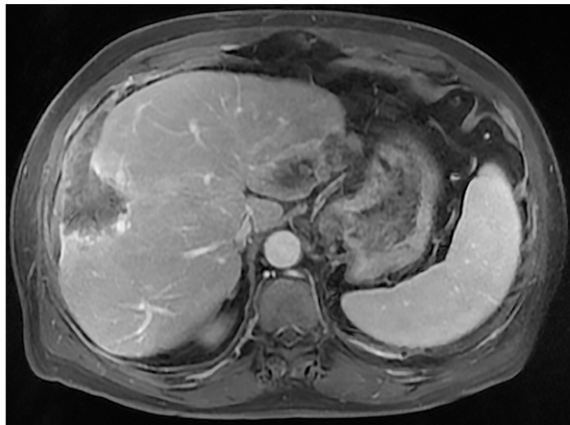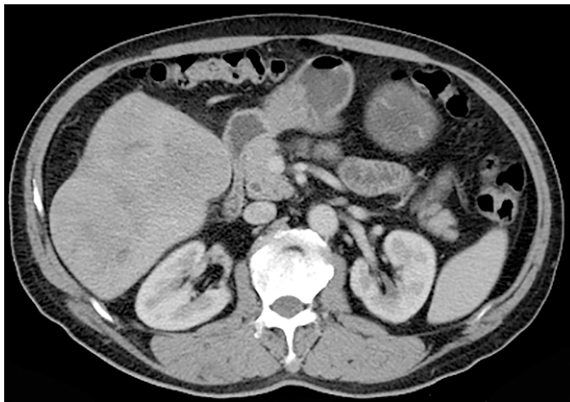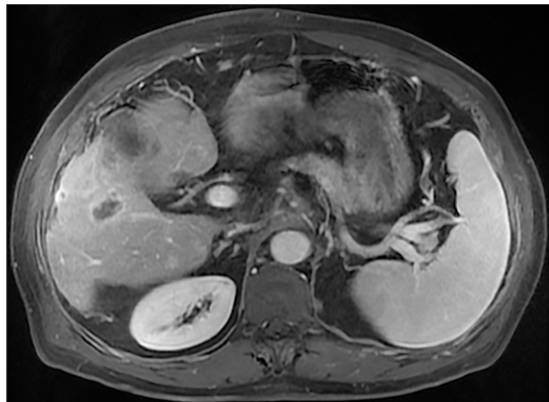

**(H)**

**Before treatment**

**After treatment**

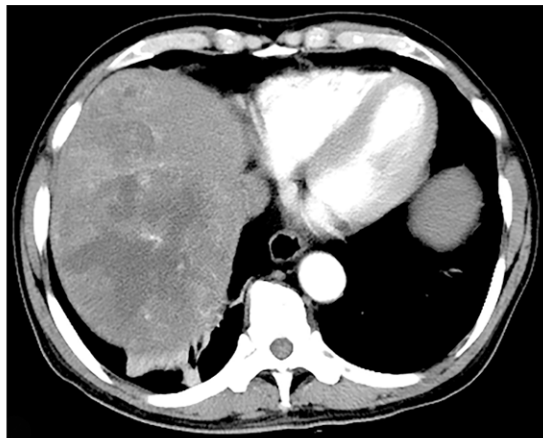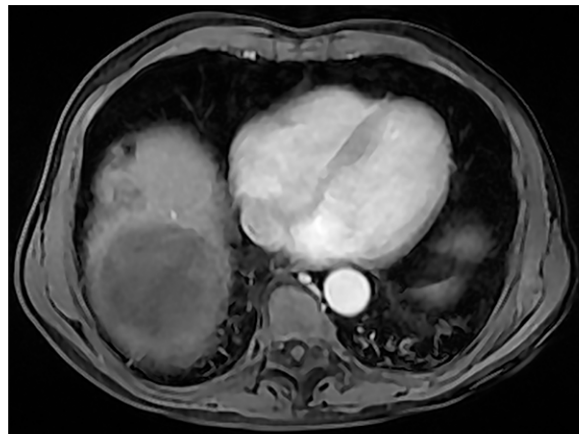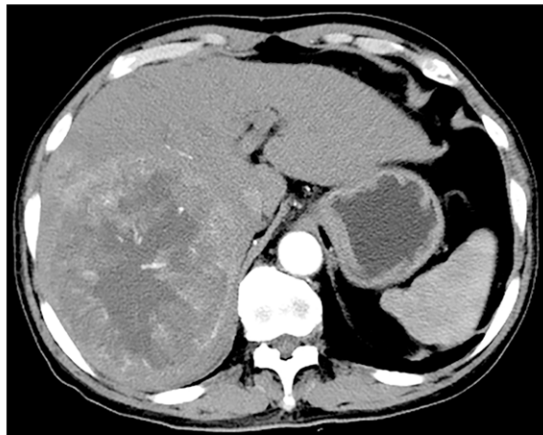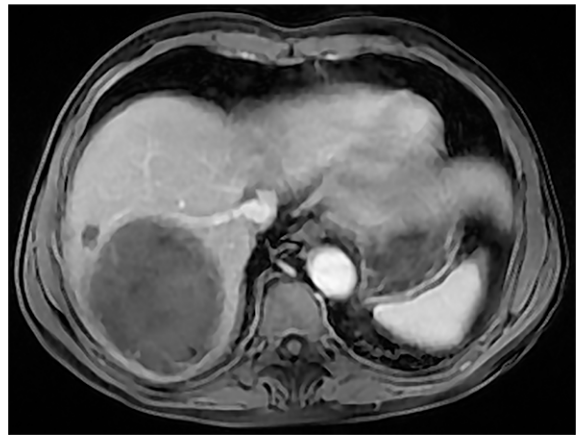



(I)

**Before treatment**

**After treatment**

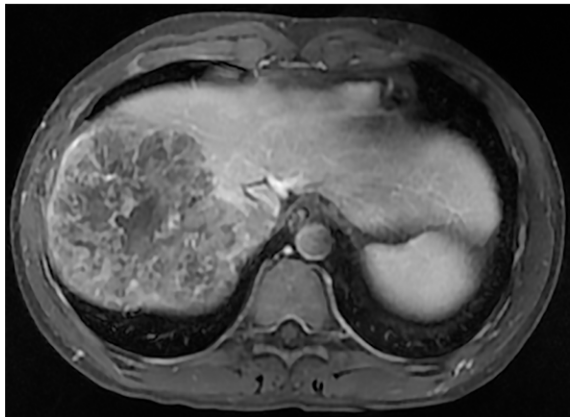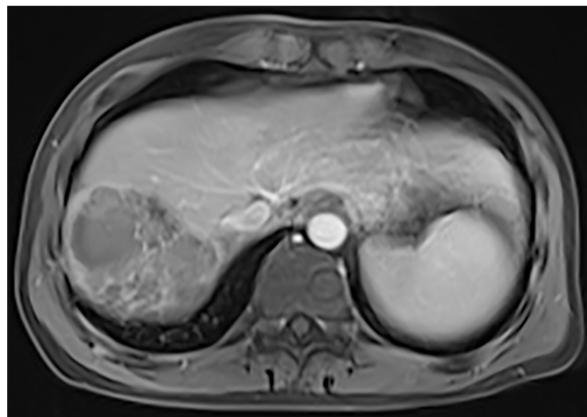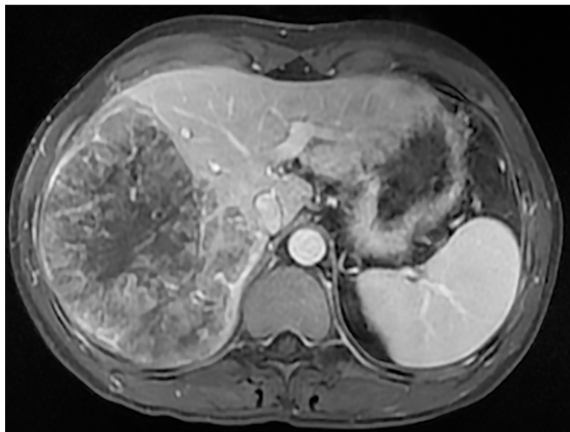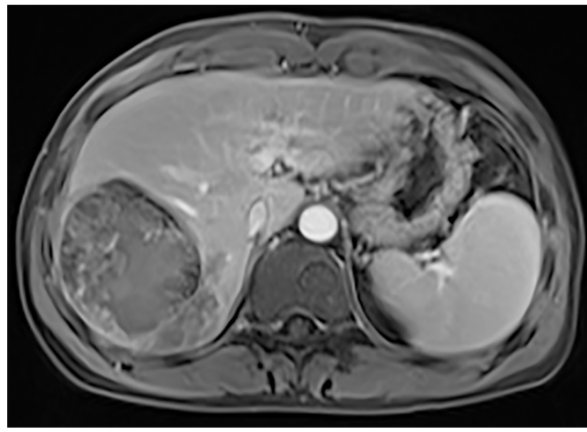

**(J)**

**Before treatment**

**After treatment**

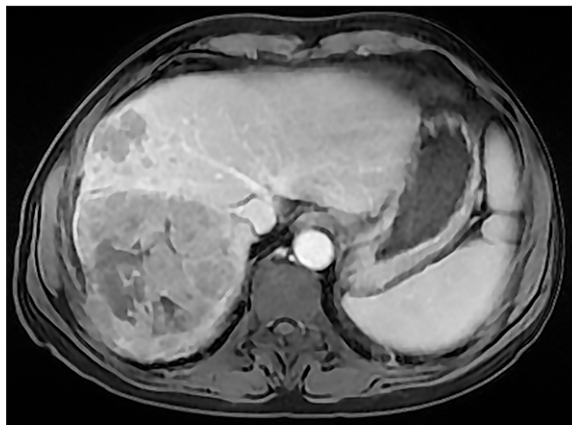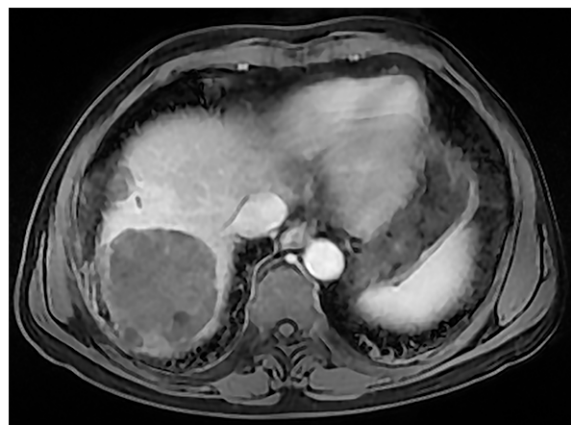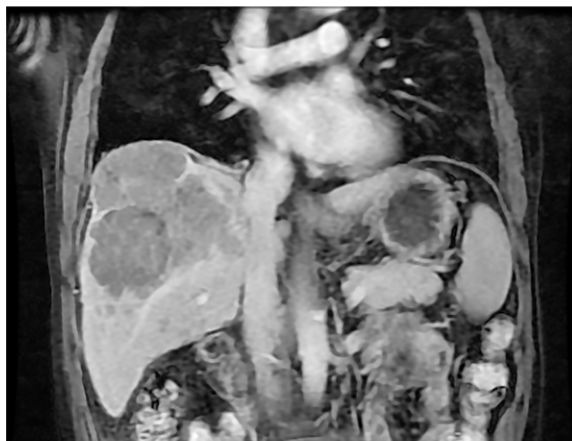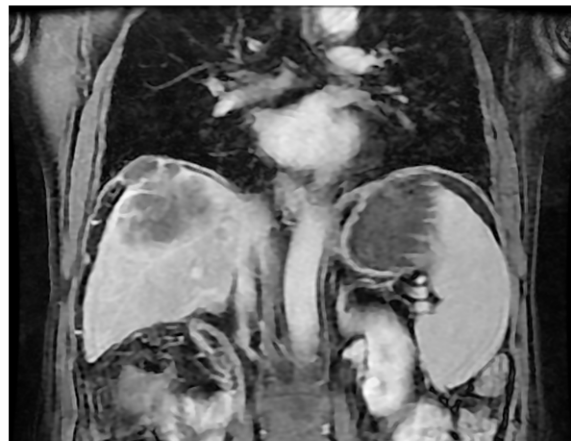

**Supplementary Figure 1** CT or MRI scans of ten representative patients who were treated with the combination of HAIC with TKIs and anti-PD-1 antibodies. **(A)** Patients 1 achieved partial response based on RECIST and mRECIST criteria. **(B)** Patients 2 achieved partial response based on RECIST and mRECIST criteria. **(C)** Patients 3 achieved partial response based on RECIST and mRECIST criteria. **(D)** Patients 4 achieved partial response based on RECIST and mRECIST criteria. **(E)** Patients 5 achieved partial response based on RECIST and mRECIST criteria. **(F)** Patients 6 achieved partial response based on RECIST and mRECIST criteria. **(G)** Patients 7 achieved partial response based on RECIST and mRECIST criteria. **(H)** Patients 8 achieved partial response based on RECIST and mRECIST criteria. **(I)** Patients 9 achieved partial response based on RECIST and mRECIST criteria. **(J)** Patients 10 achieved partial response based on RECIST and mRECIST criteria.

CT, Computed Tomography; MRI, Magnetic Resonance Imaging; HAIC, hepatic arterial chemotherapy; TKIs, tyrosine kinase inhibitor; RECIST, Response Evaluation Criteria in Solid Tumors; PVTT, portal vein tumor thrombus; IVCTT, inferior vena cava tumor thrombus.
